# Supplementary material
Source: Research Square preprint supplement (doi:10.21203/rs.3.rs-9115451/v1)
Supplement: Supplementary file 1 [file 159811490b3b698f4f285380.docx]

**Appendix**

**I IN-DEPTH INTERVIEW GUIDE**

A **Study location** ________________________

**IDI** ________________________________

**Date** _________________________________

B **Interview guide**

1. Introduction and warm-up
2. Assurance of confidentiality
3. Permission to record discussion
4. Opening remark

We are here to conduct an interview with you on social media influences on stroke awareness. We are interested in all your ideas, comments and suggestions. All comments, both negative and positive, are welcome. Please feel free to disagree with one another. We would like to have many points of view. To help in remembering what we will discuss, there will be a tape recording if you will permit. This will be compared with the notes to be taken by my colleague here. All comments are confidential and for research purposes only. We would also want you to speak one at a time so that the tape recorder can pick up your voice appropriately and clearly. But before we start, we need to know each other’s names and what we do.

1. General introduction
2. Socio-demographic characteristic (Ask for name of area of residence/community, sex, age, level of education, marital status, occupation, place of residence, level of income per month and religious affiliation)
3. From your point of view, what is the prevalence rate of stroke (Probe to know the rate at which stroke has spread in the community, how common is stroke? Can you recall any case in your community or workplace?
4. How does social media influence your knowledge and perception of stroke? Probe for posts, videos, or campaigns about stroke awareness. Probe for social media platforms that spread stroke-related information.
5. What are the risk factors associated with stroke information from social media? (Probe for whether the information is clear and easy to understand? Probe to ascertain whether they find any of the information confusing, false, misleading or contradictory?” Probe to know if they have taken any steps or changed anything in their lifestyle because of what you learned from social media about stroke?)
